# Supplementary material for: Quantitative and qualitative changes in platelet traits of sunitinib-treated patients with renal cell carcinoma in relation to circulating sunitinib levels: a proof-of-concept study
Source: PubMed Central journal article supplement (PMC9195440; doi:10.1186/s12885-022-09676-0), 2022-06-13
Supplement: 12885_2022_9676_MOESM1_ESM.pdf [file 12885_2022_9676_MOESM1_ESM.pdf]

1 **Supplementary Material**

2

3 **Quantitative and qualitative changes in platelet traits of sunitinib-treated patients with**  
 4 **renal cell carcinoma in relation to circulating sunitinib levels: a proof-of-concept study**

5

6 Bibian M.E. Tullemans et al.

7

8 **Supplemental Tables**

9

10 **Supplemental Table 1** Reported bleeding correlates with platelet aggregation in RCC  
 11 patients at 4 weeks on treatment

| Variables      | Time point | Reported bleeding    |     |                      |     | Correlation |         |
|----------------|------------|----------------------|-----|----------------------|-----|-------------|---------|
|                |            | No median (IQR)      | n   | Yes median (IQR)     | n   | R           | P-value |
| Platelet count | Week 2     | 132.5 (75.8-229.8)   | n=9 | 164.0 (119.0-194.8)  | n=8 | -0.0515     | 0.8498  |
|                | Week 4     | 78.5 (49.0-202.0)    | n=7 | 132.3 (98.4-155.0)   | n=8 | 0.0201      | 0.9508  |
|                | Month 3    | 162.5 (104.5-255.8)  | n=4 | 161.5 (137.8-202.0)  | n=5 | -0.3651     | 0.3786  |
| ΔAggregation   | Week 2     | -10.7 (-29.6 - 4.0)  | n=6 | -3.8 (-6.7 - 0.8)    | n=6 | 0.2612      | 0.4072  |
|                | Week 4     | -3.8 (-5.7 - 12.2)   | n=4 | -24.0 (-62.3 - -7.8) | n=8 | -0.6680     | 0.0206* |
|                | Month 3    | -10.2 (-22.1 - 12.7) | n=4 | -6.8 (-12.0 - -4.8)  | n=5 | 0.02623     | 0.9516  |
| Progression %  | -          | 10.0 (0.0 - 31.3)    | n=4 | 0 (-22.3 - 14)       | n=8 | -0.2500     | 0.4285  |

12 IQR: interquartile range

13

14

15

16 **Supplemental Table 2** No correlation of disease progression with changes in blood cell  
 17 counts and platelet aggregation in mRCC patients

| Variables               | Time point | Progression             |     |                       |     | Correlation |         |
|-------------------------|------------|-------------------------|-----|-----------------------|-----|-------------|---------|
|                         |            | No (PR+SD) median (IQR) | n   | Yes (PD) median (IQR) | n   | R           | P-value |
| ΔPlatelet count         | Week 2     | -87.5 (-189.9 - -36.8)  | n=8 | -36.5 (-60.3 - 24.8)  | n=4 | 0.4609      | 0.1535  |
|                         | Week 4     | -143.3 (-194.6 - -45.1) | n=8 | -73.0 (-147.0 - -8.8) | n=5 | 0.2535      | 0.4351  |
|                         | Month 3    | -77.8 (-137.8 - -8.6)   | n=8 | 4.5 (-42.5 - 51.5)    | n=2 | 0.4352      | 0.2667  |
| ΔWhite blood cell count | Week 2     | -1.68 (-4.04 - -0.08)   | n=8 | -0.68 (-2.05 - 1.26)  | n=4 | 0.4104      | 0.1980  |
|                         | Week 4     | -3.65 (-5.03 - -2.02)   | n=8 | -2.65 (-3.18 - -0.83) | n=5 | 0.4655      | 0.1181  |
|                         | Month 3    | -3.70 (-5.70 - -1.35)   | n=8 | 0.65                  | n=1 | 0.5477      | 0.2222  |
| ΔRed blood cell count   | Week 2     | 0.21 (0.2 - 0.33)       | n=8 | 0.25 (-0.07 - 0.41)   | n=4 | 0.1282      | 0.7152  |
|                         | Week 4     | -0.06 (-0.17 - 0.18)    | n=8 | 0.08 (-0.01 - 0.35)   | n=5 | 0.3803      | 0.2222  |
|                         | Month 3    | -0.93 (-1.73 - -0.50)   | n=8 | -0.87                 | n=1 | 0.1369      | 0.8889  |
| ΔAggregation            | Week 2     | -7.7 (-24.0 - -1.2)     | n=8 | -5.7                  | n=1 | 0.0688      | 1.0000  |
|                         | Week 4     | -24.0 (-60.2 - -4.2)    | n=8 | -6.6 (-72.1 - 7.3)    | n=4 | 0.2132      | 0.6095  |
|                         | Month 3    | -6.6 (-14.5 - 5.6)      | n=6 | -10.2 (-18.1 - -2.4)  | n=2 | -0.0870     | 0.8889  |

18 IQR: interquartile range; PR: partial response; PD: progressive disease; SD: stable disease.
